# Supplementary material for: Genetic Dissection of the Breakdown of Durable Resistance in Indica Rice Variety PTB33 to Brown Planthoppers Nilaparvata Lugens (Stål)
Source: Research Square preprint supplement (doi:10.21203/rs.3.rs-1131675/v1), 2021-12-03
Supplement: Supplementary file 2 [file 9144fbd210702ab67a26d1ae.xlsx]

## Sheet: TableS1
	Table S1. QTL analysis in the B1F2 and B1F3 populations using five BPH populations by genotyping-by-sequencing.
	Plant population		BPH populations	No. of plants	No. of
	Generation	Genetic background			markers
	B1F2	T65	1966-Hadano	106	6236
	B1F3	T65	1989-Chikugo	100	4418
	B1F3	T65	1999-Koshi	100	4302
	B1F3	T65	2013-Koshi	94	6012
	B1F2	PTB33	1966-Hadano	111	6264
	B1F3	PTB33	1989-Chikugo	99	4295
	B1F3	PTB33	1999-Koshi	97	4048
	B1F3	PTB33	2013-Koshi	98	4583

## Sheet: TableS2
	Table S2. Primer sequences of the SSR markers.
	Marker	Chr.	Forward primer sequences	Reverce primer sequences	Physical Position (Mbp)a	Referenceb
	RM218	3	TCAAACCAAGGTCCTTCAACTGC	TTTCTTCCACCGTCCATGTATCC	8.40643	Chen et al. (1997)
	RM3803	3	CGTGGTACCAATTGTGTAGTTGACC	GGCACAAAGTTCTCCATTCATCC	10.6581	McCouch et al. (2002)
	RM8213	4	AGCCCAGTGATACAAAGATG	GCGAGGAGATACCAAGAAAG	4.44603	McCouch et al. (2002)
	RM16497	4	TGTGGAGGCTTAGGAAATTCTGG	TGTGAAACATGCCACGATACTGC	6.57684	IRGSP (2005)
	RM5953	4	AAACTTTCTGTGATGGTATC	ATCCTTGTCTAGAATTGACA	9.38881	McCouch et al. (2002)
	RM16624	4	AAGCAGCAACGTCTCTTCCAATCTCC	CCACGACCACGACACAAGATGG	12.4483	IRGSP (2005)
	RM7279	4	TGAAGGAGATACACCGAAAC	GGCTTGAGAGCGTTTGTAG	13.7731	McCouch et al. (2002)
	RM3735	4	GCGACCGATCAGCTAGCTAG	ATAACTCCTCCCTTGCTGCC	26.3959	McCouch et al. (2002)
	RM5503	4	GGGAAGAAGATAGGAGATGG	CTCTGGGTACACTTCACGAG	30.3636	McCouch et al. (2002)
	RM508	6	AGAAGCCGGTTCATAGTTCATGC	ACCCGTGAACCACAAAGAACG	0.442615	Temnykh et al. (2001)
	RM588	6	TCTTGCTGTGCTGTTAGTGTACG	GCAGGACATAAATACTAGGCATGG	1.61241	Temnykh et al. (2001)
	RM3831	7	CTCCACGTTCTCCGACGAG	GCGGCAACTCCTACATATCC	1.16575	McCouch et al. (2002)
	RM1243	7	CACCTCAACCGATAGAGTGAACC	TCTATTTCGGGAGGGATTATGACC	3.55566	McCouch et al. (2002)
	RM5426	7	GAGAGTAGTGGCTGTTCCGC	GCGGTTTCGATCTCTACGAG	25.9316	McCouch et al. (2002)
	RM248	7	AGAGAGCAAGTTTGAAGCGAAGC	ACCAAGAGGGTAGCCTAGCATGG	29.3408	Chen et al. (1997)
	RM404	8	CCAATCATTAACCCCTGAGC	GCCTTCATGCTTCAGAAGAC	15.4408	Temnykh et al. (2001)
	RM5887	8	ACCGACGACTCGTACAAAGG	CTCACTTTGGGCTTTTGACC	20.9789	McCouch et al. (2002)
	RM3492	9	ACATCTCTCTCGCTCCCTTTCC	GGCTTTAAAGGGTGGATTGAACC	16.4955	McCouch et al. (2002)
	RM257	9	CCGTGCAACTTAAATCCAAACAGG	GGAATCCTATATGAGCCAGTGATGG	17.7207	Chen et al. (1997)
	RM206	11	ATCGATCCGTATGGGTTCTAGC	GTCCATGTAGCCAATCTTATGTGG	22.4808	Chen et al. (1997)
	RM224	11	ATCGATCGATCTTCACGAGG	TGCTATAAAAGGCATTCGGG	27.6733	Chen et al. (1997)
	RM1986	12	TAACGGAGGGAGTAGTTTTC	GAACCTACATATCGAGAGCA	21.2465	McCouch et al. (2002)
	RM28424	12	TCCACACACTTCGCCAATAAACC	CCGCCACCACTCCTCTATCC	22.3707	IRGSP (2005)
	RM28466	12	CCGACGAAGAAGACGAGGAGTAGCC	AGGCCGGAGAGCAATCATGTCG	22.9755	IRGSP (2005)
	RM1103	12	CAGCTGCTGCTACTACACCG	CTACTCCACGTCCATGCATG	23.573	McCouch et al. (2002)
	aPhysical positions in the rice reference sequence of Nipponbare version IRGSP-1.0.
	bReferences Chen, X., S. Temnykh, Y. Xu, Y. Cho, S. R. McCouch (1997) Development of a microsatellite framework map providing genome-wide coverage in rice (Oryza sativa L.). Theor. Appl. Genet. 95: 553–567. Temnykh, S., W. Park., N. Ayres, S. Cartinhour, N. Hauck, L. Lipovich, Y. Cho, T. Ishii, S. R. McCouch (2000) Mapping and genome organization of microsatellite sequences in rice (Oryza sativa …

## Sheet: TableS3
	Table S3. QTLs for females with a swollen abdomen at 5 days after infestation detected in B1F4 populations derived from backcrossing with T65.
	Population	QTL	Chr.	Flanking marker	Position (Mbp)a	LOD	Additive effect (%)b	Dominance effect (%)	PEV (%)c
	102	qFSA4a	4	RM5953-RM16624	9.4-12.4	2.3	-8.9	-16.8	10.5
	114	qFSA6	6	RM588	1.6	6	-26.5	9.2	25.1
	109	qFSA11	11	RM224	27.7	4.1	-13.2	-17.8	18.3
	110	qFSA12	12	RM28466	23	2	-11.5	-9.9	8.6
	a The physical position was obtained from International Rice Genome Sequencing Project (IRGSP-1.0).
	b Genetic effects of PTB33 allele are shown. Plus values represent PTB33 allele increase genetic values of trait.
	c Percentage of explained phenotypic variation.
